# Supplementary material for: Fall Armyworm Gut Bacterial Diversity Associated with Different Developmental Stages, Environmental Habitats, and Diets
Source: MDPI journal article supplement (doi:10.3390/insects13090762), 2022-08-24
Supplement: s1 [file s1]

Table S3 Bacterial identified persist throughout different stages of development

| OUT ID | Phylum           | Genus           |
|--------|------------------|-----------------|
| OTU478 | Proteobacteria   | Enterobacter    |
| OTU956 | Actinobacteriota | Corynebacterium |
| OTU877 | Proteobacteria   | -               |
| OTU346 | Firmicutes       | Enterococcus    |
| OTU784 | Firmicutes       | Enterococcus    |
| OTU884 | Proteobacteria   | Acinetobacter   |
