# Supplementary material for: Fall Armyworm Gut Bacterial Diversity Associated with Different Developmental Stages, Environmental Habitats, and Diets
Source: MDPI journal article supplement (doi:10.3390/insects13090762), 2022-08-24
Supplement: s1 [file s1]

Table S2 Sequencing data statistics of all samples

| Sample\Info | Seq_num | Base_num | Mean_length | Min_length | Max_length |
|-------------|---------|----------|-------------|------------|------------|
| Egg_1       | 33972   | 14452598 | 425.4268    | 264        | 437        |
| Egg_2       | 33861   | 14469972 | 427.3345    | 209        | 431        |
| Egg_3       | 50598   | 21495716 | 424.8333    | 239        | 437        |
| L1_1        | 44903   | 19262729 | 428.9853    | 403        | 430        |
| L1_2        | 44870   | 19246791 | 428.9456    | 248        | 430        |
| L1_3        | 35970   | 15423748 | 428.7948    | 209        | 518        |
| L2_1        | 52622   | 22574259 | 428.989     | 404        | 430        |
| L2_2        | 43056   | 18470703 | 428.9925    | 404        | 489        |
| L2_3        | 42328   | 18128173 | 428.2785    | 249        | 444        |
| L3_1        | 37810   | 16219358 | 428.9701    | 404        | 430        |
| L3_2        | 42468   | 18217473 | 428.9694    | 347        | 432        |
| L3_3        | 36896   | 15826941 | 428.9609    | 403        | 527        |
| L4_1        | 36624   | 14745866 | 402.6285    | 237        | 498        |
| L4_2        | 31451   | 13458842 | 427.9305    | 403        | 431        |
| L4_3        | 48883   | 20958596 | 428.7502    | 403        | 430        |
| L5_1        | 33262   | 14255175 | 428.5724    | 388        | 430        |
| L5_2        | 41419   | 16985799 | 410.0968    | 259        | 498        |
| L5_3        | 52434   | 22485103 | 428.8268    | 403        | 432        |
| L6_1        | 41407   | 17514672 | 422.9882    | 200        | 521        |
| L6_2        | 46815   | 19822978 | 423.4322    | 202        | 495        |
| L6_3        | 88537   | 37911890 | 428.2039    | 400        | 431        |
| Female_1    | 38448   | 16493708 | 428.9874    | 277        | 430        |
| Female_2    | 41404   | 17761878 | 428.9894    | 404        | 430        |
| Female_3    | 36934   | 15843982 | 428.9809    | 403        | 430        |
| Male_1      | 41786   | 17924601 | 428.9619    | 248        | 431        |
| Male_2      | 36348   | 15592312 | 428.973     | 404        | 430        |
| Male_3      | 39632   | 17001280 | 428.9786    | 200        | 430        |
| Lab_1       | 57566   | 23942432 | 415.9127    | 262        | 528        |
| Lab_2       | 48283   | 20118635 | 416.6815    | 264        | 479        |
| Lab_3       | 41594   | 17419696 | 418.8031    | 204        | 478        |
| Field_1     | 53373   | 22305692 | 417.9209    | 389        | 479        |
| Field_2     | 47805   | 19929785 | 416.8975    | 224        | 470        |
| Field_3     | 52542   | 22375862 | 425.8662    | 201        | 505        |
| DF_1        | 30861   | 13228497 | 428.6477    | 262        | 431        |
| DF_2        | 39444   | 16918849 | 428.9334    | 262        | 430        |
| DF_3        | 39552   | 16967418 | 428.9901    | 406        | 431        |
| MF_1        | 44881   | 18251547 | 406.6653    | 233        | 499        |
| MF_2        | 45712   | 18591287 | 406.7047    | 227        | 446        |
| MF_3        | 40683   | 16523741 | 406.1584    | 212        | 439        |
