# Supplementary material for: Fall Armyworm Gut Bacterial Diversity Associated with Different Developmental Stages, Environmental Habitats, and Diets
Source: MDPI journal article supplement (doi:10.3390/insects13090762), 2022-08-24
Supplement: s1 [file s1]

Table S1. Primers used in this study.

| Software/database | Version  | Application                                                                            | Link                                                                                                            |
|-------------------|----------|----------------------------------------------------------------------------------------|-----------------------------------------------------------------------------------------------------------------|
| Flash             | 1.2.11   | pair-end sequence splicing                                                             | <a href="https://ccb.jhu.edu/software/FLASH/index.shtml">https://ccb.jhu.edu/software/FLASH/index.shtml</a>     |
| Qiime             | 1.9.1    | Generate abundance table for each taxonomy level,<br>calculate beta diversity distance | <a href="http://qiime.org/install/index.html">http://qiime.org/install/index.html</a>                           |
| Uparse            | 7.0.1090 | OTU cluster                                                                            | <a href="http://www.drive5.com/uparse/">http://www.drive5.com/uparse/</a>                                       |
| RDP Classifier    | 2.1      | Sequence classification annotation                                                     | <a href="https://sourceforge.net/projects/rdp-classifier/">https://sourceforge.net/projects/rdp-classifier/</a> |
| Usearch           | 7.0      | OTU statistics                                                                         | <a href="http://www.drive5.com/usearch/">http://www.drive5.com/usearch/</a>                                     |
| Mothur            | 1.30.2   | alpha diversity analysis                                                               | <a href="https://www.mothur.org/wiki/Download_mothur">https://www.mothur.org/wiki/Download_mothur</a>           |
| PICRUSt           | 1.1.0    | function prediction of KEGG、COG、Pfam                                                   | <a href="http://picrust.github.io/picrust/">http://picrust.github.io/picrust/</a>                               |
| Mega              | 7.0      | phylogenetic analysis                                                                  | <a href="https://www.megasoftware.net/">https://www.megasoftware.net/</a>                                       |
| SILVA             | 132      | rRNA database                                                                          | <a href="https://www.arb-silva.de/">https://www.arb-silva.de/</a>                                               |
| RDP               | 11.5     | rRNA database                                                                          | <a href="http://rdp.cme.msu.edu/">http://rdp.cme.msu.edu/</a>                                                   |
| GreenGenes        | 135      | rRNA database                                                                          | <a href="http://greengenes.secondgenome.com/">http://greengenes.secondgenome.com/</a>                           |
| FunGene           | 9.6      | Functional gene database                                                               | <a href="http://www.fungene-db.fr/">http://www.fungene-db.fr/</a>                                               |
| Tax4fun           | 0.3.1    | Tax4Fun function prediction                                                            | <a href="http://tax4fun.gobics.de/">http://tax4fun.gobics.de/</a>                                               |
| MAFFT             | 7.2      | Multiple sequence alignment                                                            | <a href="https://mafft.cbrc.jp/alignment/software/">https://mafft.cbrc.jp/alignment/software/</a>               |
| IQ-TREE           | 1.6.8    | Constructing evolutionary trees                                                        | <a href="http://www.iqtree.org/">http://www.iqtree.org/</a>                                                     |
| Fastp             | 0.19.6   | Quality control                                                                        | <a href="https://github.com/OpenGene/fastp">https://github.com/OpenGene/fastp</a>                               |
